# Supplementary material for: Gout prevalence and predictors of urate-lowering therapy use: results from a population-based study
Source: Springer Nature journal article supplement (doi:10.1186/s13075-018-1633-9), 2018-07-11
Supplement: MOESM2 [file 15945736]

**Additional file 2**

**Table S1. Prevalence of gout by age group and gender from the South Australian 2015 Health Omnibus Survey**

| Gender | Age Group | Gout Prevalence     | Std. Err | Lower 95% CI | Upper 95% CI |
|--------|-----------|---------------------|----------|--------------|--------------|
| Male   | 25-34     | 0.016               | 0.010    | 0.005        | 0.051        |
| Male   | 35-44     | 0.054               | 0.020    | 0.026        | 0.109        |
| Male   | 45-54     | 0.107               | 0.024    | 0.068        | 0.165        |
| Male   | 55-64     | 0.134               | 0.025    | 0.093        | 0.191        |
| Male   | 65+       | 0.237               | 0.021    | 0.199        | 0.280        |
| Female | 25-34     | 0 (no observations) |          |              |              |
| Female | 35-44     | 0.004               | 0.004    | 0.001        | 0.030        |
| Female | 45-54     | 0.031               | 0.011    | 0.015        | 0.061        |
| Female | 55-64     | 0.015               | 0.006    | 0.007        | 0.035        |
| Female | 65+       | 0.057               | 0.009    | 0.042        | 0.078        |

**Table S2. Birth country prevalence (%). Odds Ratios are for the comparison of gout to non-gout participants.**

| Country of Birth       | SA Population | Gout population     | Odds Ratio (95% CI) | p-val |
|------------------------|---------------|---------------------|---------------------|-------|
| Australia <sup>1</sup> | 70.53%        | 73.93%              | 1                   |       |
| UK & Ireland           | 10.30%        | 16.99%              | 1.6 (1.1, 2.5)      | 0.022 |
| Europe                 | 6.58%         | 4.35%               | 0.6 (0.3, 1.2)      | 0.16  |
| New Zealand            | 1.07%         | 0.92%               | 0.8 (0.2, 3.4)      | 0.78  |
| North America          | 0.42%         | 0.26%               | 0.6 (0.1, 4.6)      | 0.60  |
| Oceania                | 0.09%         | 0 (no observations) |                     | NA    |
| Asia                   | 8.86%         | 2.61%               | 0.3 (0.1, 0.8)      | 0.013 |
| Other                  | 2.16%         | 0.94%               | 0.4 (0.1, 3.0)      | 0.37  |

<sup>1</sup>1.9% of the SA population born in Australia identified as Aboriginal or Torres Strait Islander compared to 2.1% of participants with gout (p = 0.82)

**Table S3A. Coefficients from the multinomial logistic regression model for predictors of allopurinol use.**

| Allopurinol             | Coefficient    | Std.Err | 95% Lower CI | 95% Upper CI | p-val |
|-------------------------|----------------|---------|--------------|--------------|-------|
| <b>Never Taken</b>      | (base outcome) |         |              |              |       |
| <b>Previously taken</b> |                |         |              |              |       |
| Age_64                  | -0.009         | 0.015   | -0.038       | 0.019        | 0.52  |
| BMI_29                  | -0.055         | 0.039   | -0.132       | 0.022        | 0.16  |
| IRSAD_945               | -0.005         | 0.002   | -0.010       | -0.001       | 0.011 |
| Female                  | -0.697         | 0.511   | -1.702       | 0.307        | 0.17  |
| Cholesterol medications | 0.695          | 0.418   | -0.127       | 1.517        | 0.097 |
| constant                | -0.362         | 0.277   | -0.906       | 0.183        | 0.19  |
| <b>Currently taken</b>  |                |         |              |              |       |
| Age_64                  | 0.000          | 0.015   | -0.030       | 0.030        | 0.98  |
| BMI_29                  | 0.033          | 0.038   | -0.042       | 0.108        | 0.39  |
| IRSAD_945               | -0.004         | 0.002   | -0.008       | 0.001        | 0.097 |
| Female                  | -1.237         | 0.529   | -2.276       | -0.197       | 0.020 |
| Cholesterol medications | 1.300          | 0.404   | 0.507        | 2.093        | 0.001 |
| constant                | -0.326         | 0.282   | -0.879       | 0.227        | 0.25  |

F(10,517) = 3.10, p = 0.0008

**Table S3B. Predictor variables not included in the model for allopurinol use.**

Additional variables were screened for inclusion in the model for allopurinol use by adding each predictor variable, in turn, to the model described in Table S2A. Significance was determined from the joint F test of whether the regression coefficients for each predictor variable were equal to zero.

| Potential Additional Predictors | F    | df <sub>numerator</sub> | df <sub>denominator</sub> | p-val |
|---------------------------------|------|-------------------------|---------------------------|-------|
| Alcohol lifetime risk           | 0.68 | 4                       | 523                       | 0.60  |
| Smoking                         | 0.69 | 4                       | 523                       | 0.60  |
| Cardiovascular Disease          | 0.07 | 2                       | 525                       | 0.93  |
| Diabetes                        | 0.06 | 2                       | 525                       | 0.94  |
| Arthritis                       | 1.98 | 2                       | 525                       | 0.14  |
| Hypertension medications        | 1.00 | 2                       | 525                       | 0.37  |
| SF12 physical component score   | 1.64 | 2                       | 525                       | 0.20  |
| SF12 mental component score     | 0.96 | 2                       | 525                       | 0.38  |
